# Supplementary material for: Phase separation and self-assembly of cyclic amphiphilic block copolymers with a main-chain liquid crystalline segment
Source: Royal Society of Chemistry journal article supplement (doi:10.1039/c5py00346f), 2015-01-01
Supplement: c5py00346f1.pdf [file c5py00346f1.pdf]

# Supporting Information

## Phase Separation and Self-Assembly of Cyclic Amphiphilic Block Copolymers with a Main-Chain Liquid Crystalline Segment

Satoshi Honda, Maito Koga, Masatoshi Tokita,\* Takuya Yamamoto,\*  
and Yasuyuki Tezuka\*

*Department of Organic and Polymeric Materials, Tokyo Institute of Technology,*

*O-okayama, Meguro-ku, Tokyo 152-8552, Japan*

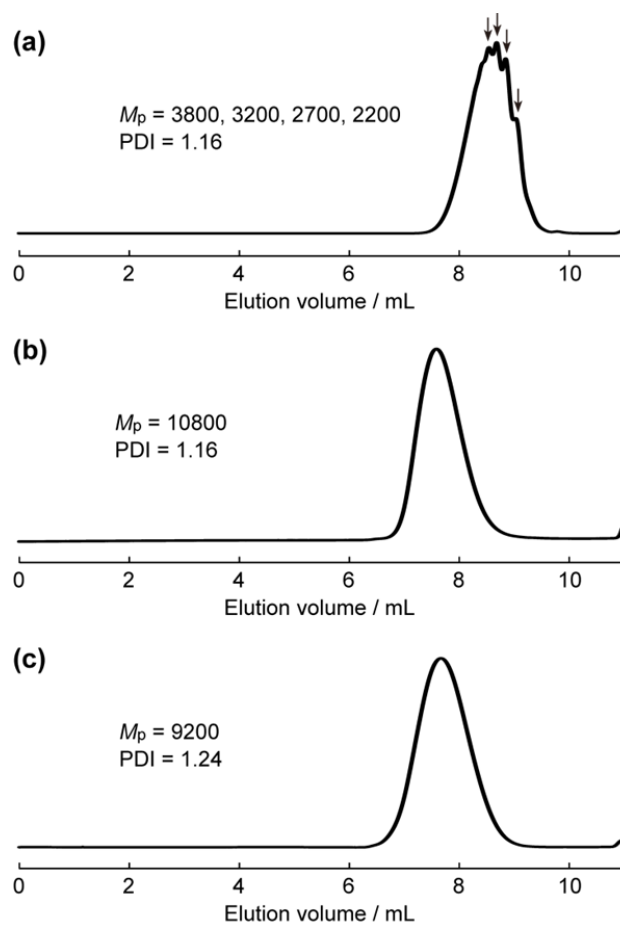

**Figure S1.** SEC traces of (a) a SEC-fractionalized  $BB_9$  macroinitiator, (b) linear  $tBA_{21}BB_9tBA_{21}$ , and (c) cyclic  $tBA_{31}BB_{10}$ .

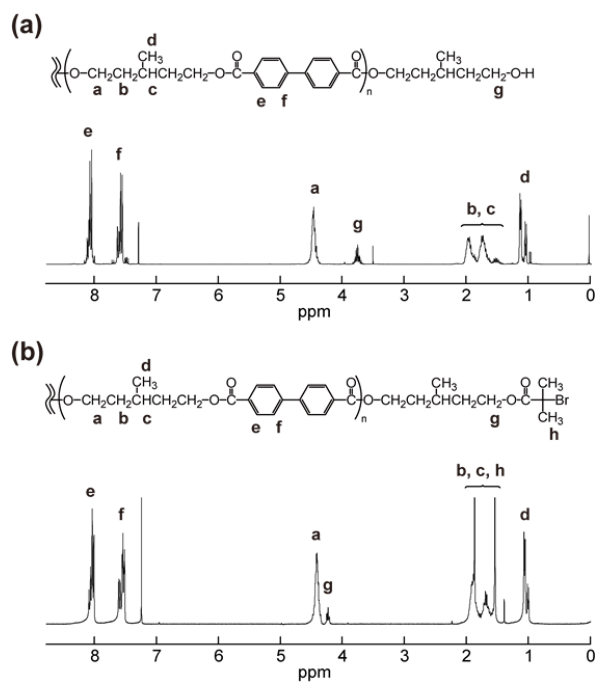

**Figure S2.**  $^1\text{H}$  NMR spectra of (a) hydroxyl-terminated  $\text{BB}_n$  and (b) a SEC-fractionated  $\text{BB}_9$  macroinitiator.

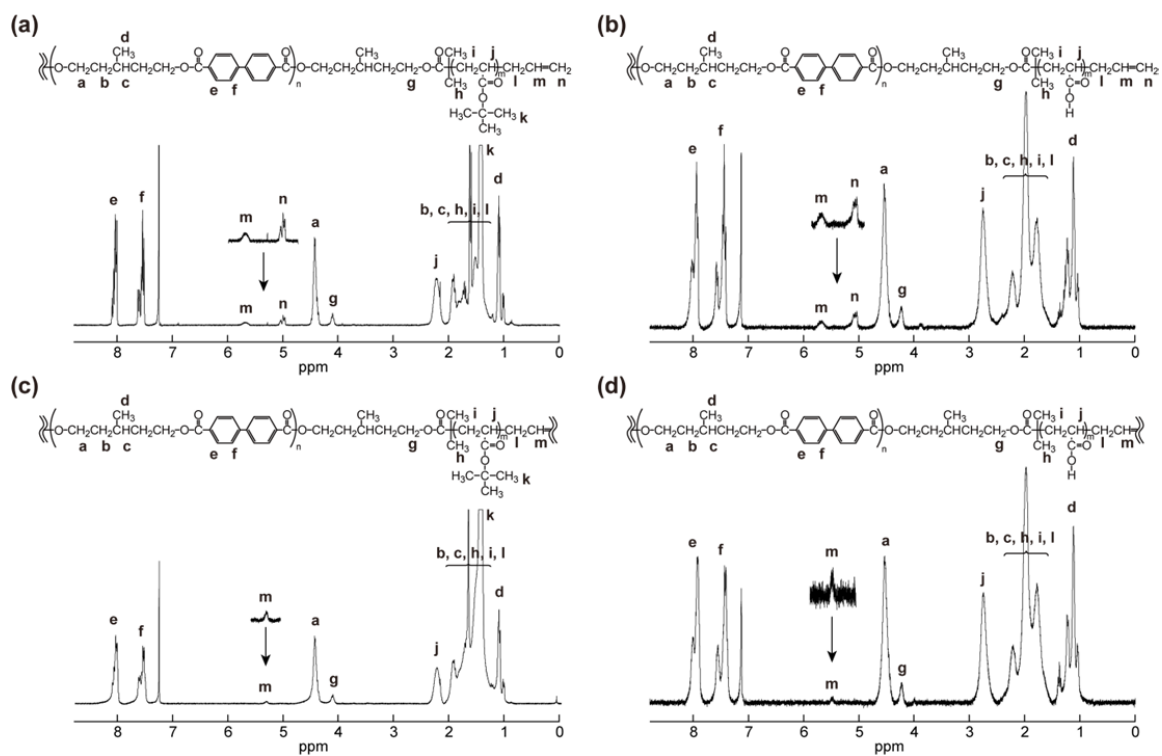

**Figure S3.**  $^1\text{H}$  NMR spectra of (a) linear  $t\text{BA}_{21}\text{BB}_9t\text{BA}_{21}$ , (b) cyclic  $t\text{BA}_{31}\text{BB}_{10}$ , (c) linear  $\text{AA}_{21}\text{BB}_9\text{AA}_{21}$ , and (d) cyclic  $\text{AA}_{33}\text{BB}_{10}$ .

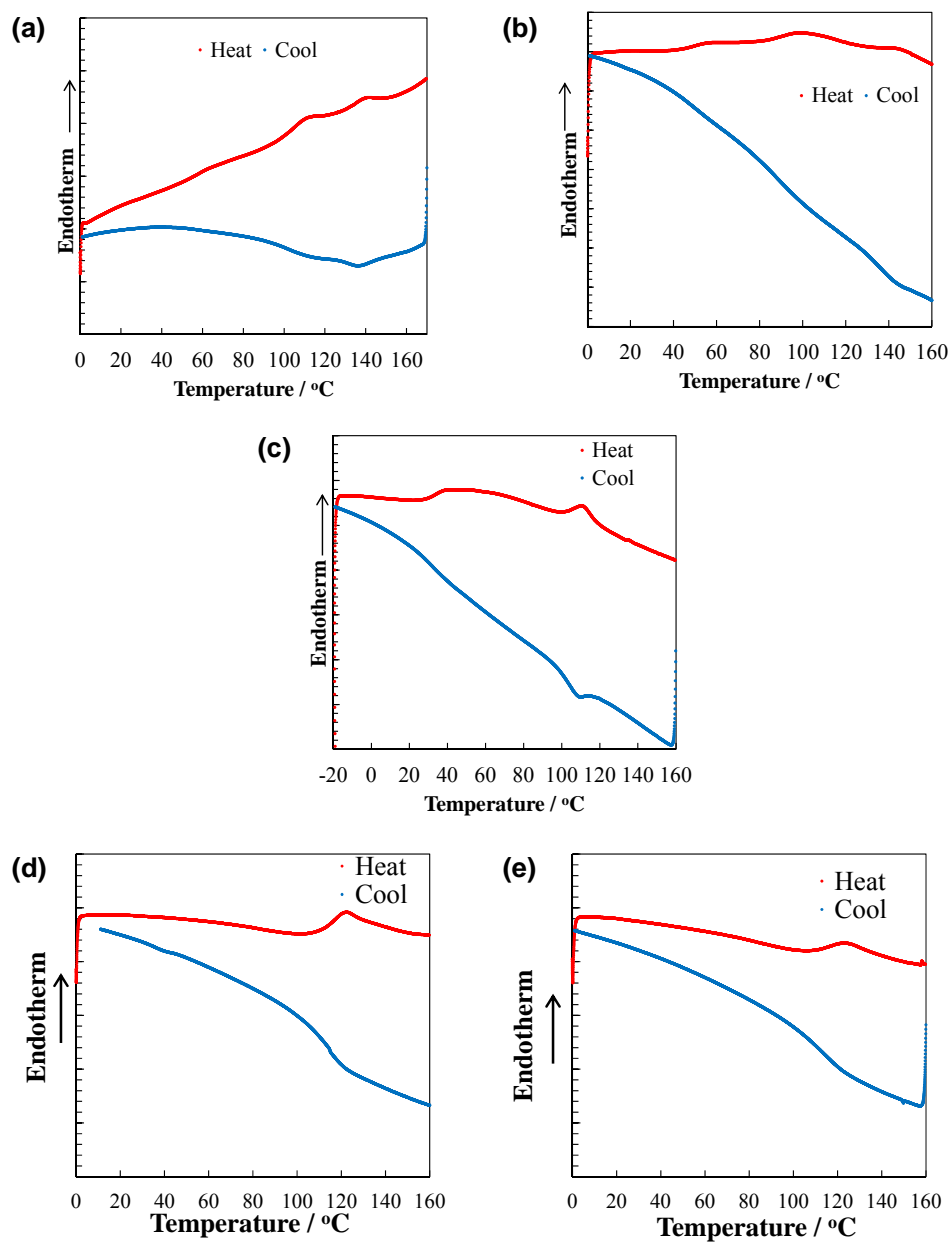

**Figure S4.** DSC thermograms of (a) linear AA<sub>21</sub>BB<sub>9</sub>AA<sub>21</sub>, (b) cyclic AA<sub>33</sub>BB<sub>10</sub>, (c) cyclic AA<sub>51</sub>BB<sub>18</sub>, (d) linear AA<sub>44</sub>BB<sub>9</sub>AA<sub>44</sub>, and (e) cyclic AA<sub>100</sub>BB<sub>9</sub>.

**Table S1.**  $T_i$ ,  $T_{g, AA}$ ,  $T_{g, BB}$ , and  $\Delta H_i$  of linear AA<sub>21</sub>BB<sub>9</sub>AA<sub>21</sub>, cyclic AA<sub>33</sub>BB<sub>10</sub>, cyclic AA<sub>51</sub>BB<sub>18</sub>, linear *t*BA<sub>50</sub>BB<sub>8</sub>*t*BA<sub>50</sub>, linear AA<sub>44</sub>BB<sub>9</sub>AA<sub>44</sub>, and cyclic AA<sub>100</sub>BB<sub>9</sub>

|                                                                            | $T_{g, BB}$ (°C) | $T_{g, AA}$ (°C) | $T_i$ (°C) | $\Delta H_i$ (kJ mol <sup>-1</sup> ) |
|----------------------------------------------------------------------------|------------------|------------------|------------|--------------------------------------|
| linear AA <sub>21</sub> BB <sub>9</sub> AA <sub>21</sub>                   | 58               | 106              | 140        | 0.56                                 |
| cyclic AA <sub>33</sub> BB <sub>10</sub>                                   | 49               | 94               | 145        | 0.50                                 |
| cyclic AA <sub>51</sub> BB <sub>18</sub>                                   | 33               | -                | 111        | 2.33                                 |
| linear <i>t</i> BA <sub>50</sub> BB <sub>8</sub> <i>t</i> BA <sub>50</sub> | 37               | -                | -          | -                                    |
| linear AA <sub>44</sub> BB <sub>9</sub> AA <sub>44</sub>                   | -                | 114              | -          | -                                    |
| cyclic AA <sub>100</sub> BB <sub>9</sub>                                   | -                | 115              | -          | -                                    |

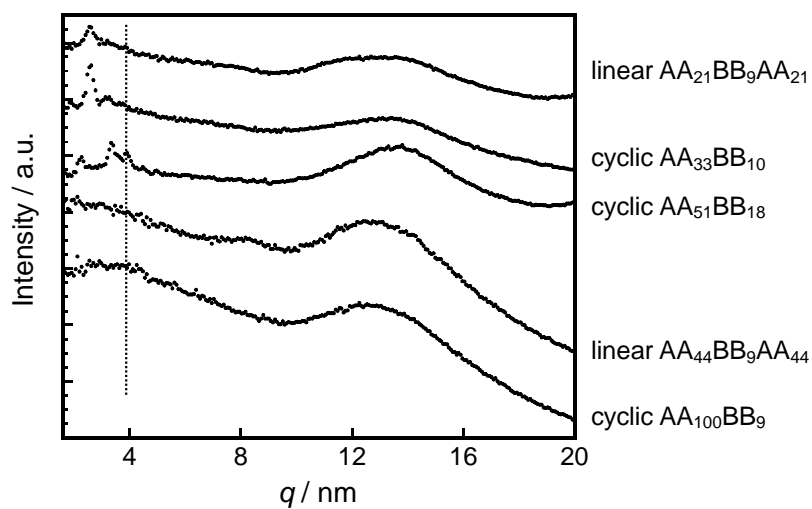

**Figure S5.** WAXD intensity profiles of linear AA<sub>21</sub>BB<sub>9</sub>AA<sub>21</sub>, cyclic AA<sub>33</sub>BB<sub>10</sub>, cyclic AA<sub>51</sub>BB<sub>18</sub>, linear AA<sub>44</sub>BB<sub>9</sub>AA<sub>44</sub>, and cyclic AA<sub>100</sub>BB<sub>9</sub>. The dashed line marks the peak position of smectic layer reflection ( $q = 3.86 \text{ nm}^{-1}$ ). The reflections at  $q < 3.86 \text{ nm}^{-1}$  are ascribed to the lamellar microdomains.

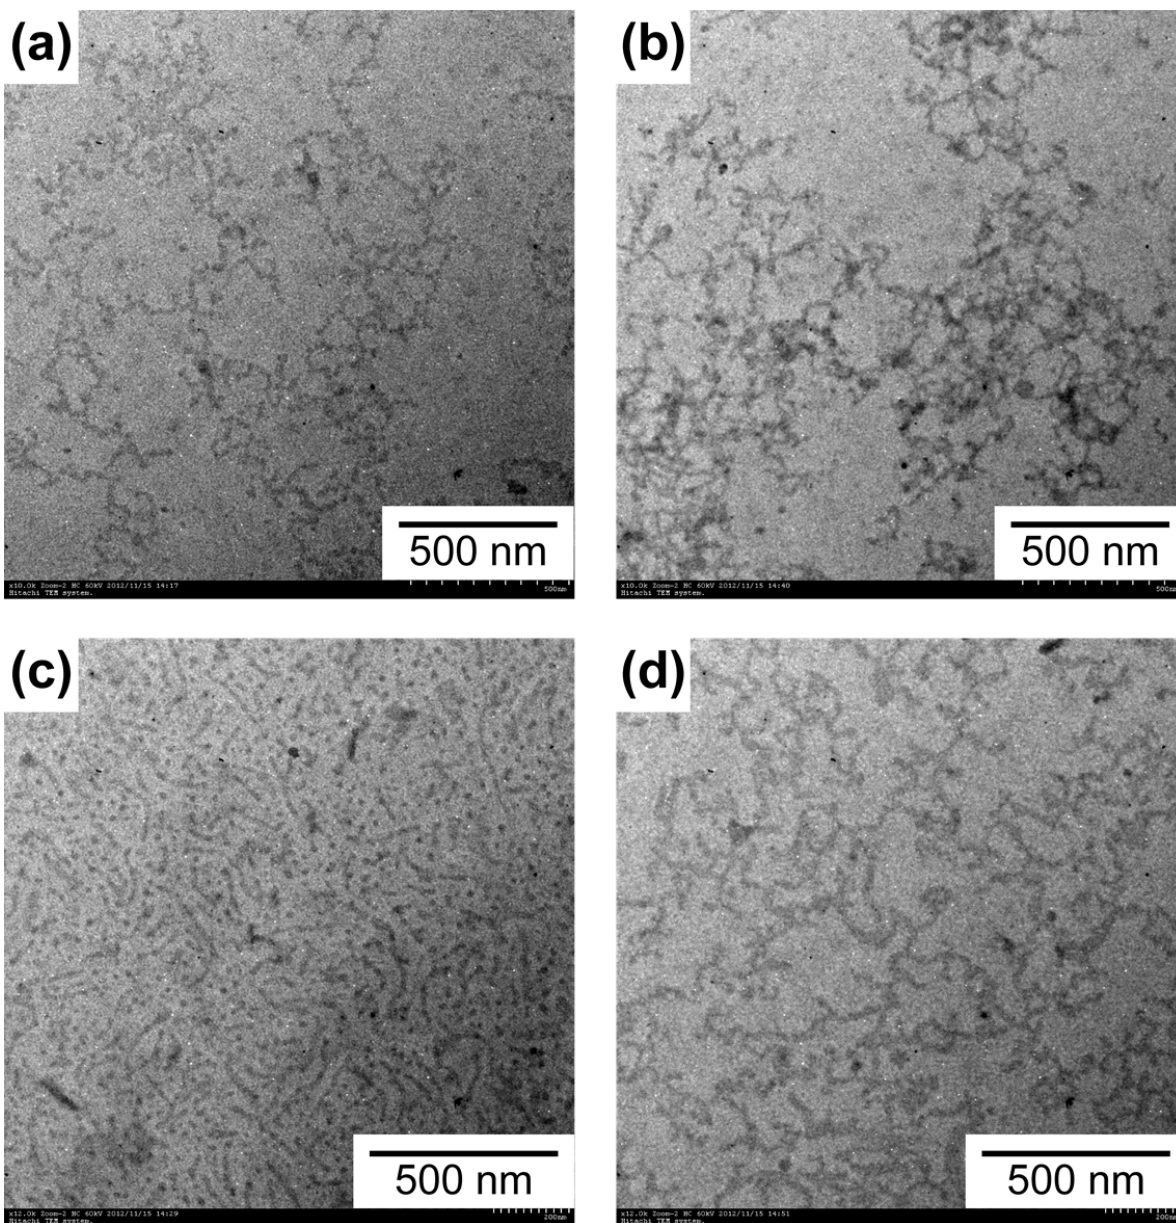

**Figure S6.** TEM images of self-assembled structures from linear  $AA_{21}BB_9AA_{21}$  and cyclic  $AA_{33}BB_{10}$  using an initial THF solution with a polymer concentration ( $c_0$ ) of 1.0 and 10 mg/mL. (a) Linear,  $c_0 = 1.0$  mg/mL. (b) Cyclic,  $c_0 = 1.0$  mg/mL. (c) Linear,  $c_0 = 10$  mg/mL. (d) Cyclic,  $c_0 = 10$  mg/mL.



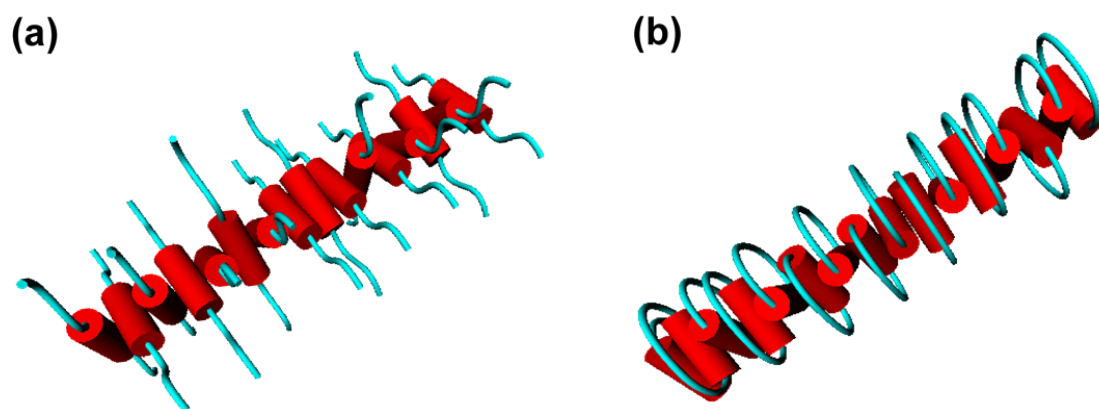

**Figure S7.** Models for cylindrical micelles self-assembled from (a) linear AA<sub>21</sub>BB<sub>9</sub>AA<sub>21</sub> and AA<sub>25</sub>BB<sub>14</sub>AA<sub>25</sub> and (b) cyclic AA<sub>33</sub>BB<sub>10</sub> and AA<sub>51</sub>BB<sub>18</sub>. Light blue and red indicate AA<sub>(2)m</sub> and BB<sub>n</sub> segments, respectively.

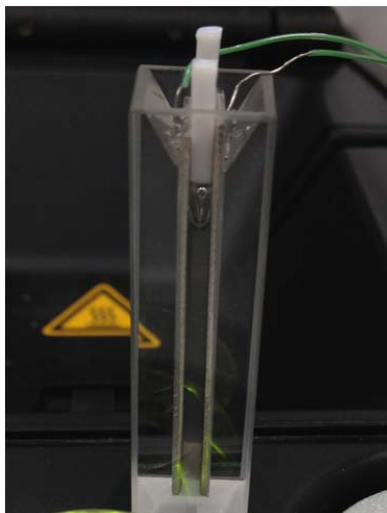

**Figure S8.** A photograph for an experimental setup to apply an electric field. Two platinum plates ( $10\text{ mm} \times 40\text{ mm} \times 1.0\text{ mm}$ ) were equipped to the inside walls of a quartz cell facing each other with 2 mm separation. Wire leads were soldered to the platinum plates to connect to a Kawaguchi Electric Works V7032A high voltage DC power supply. A suspension (0.4 mL) of self-assembled linear  $AA_mBB_nAA_m$ , cyclic  $AA_{2m}BB_n$ , or linear  $AA_{134}St_{34}AA_{134}$  was added to the cell, and electric field was applied at 1.5 V/mm for 2 min.

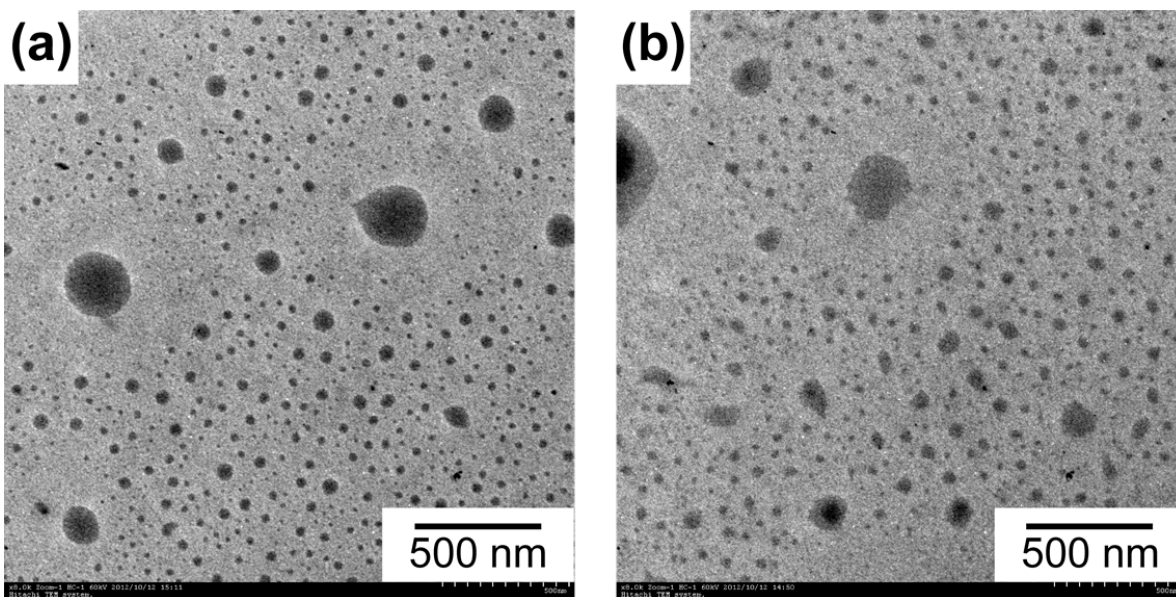

**Figure S9.** TEM images of self-assembled structures from linear AA<sub>134</sub>St<sub>34</sub>AA<sub>134</sub> (a) before and (b) after applying an electric field of 1.5 V/mm for 2 min.
